# Supplementary material for: Fractal-Based Multi-Criteria Feature Selection to Enhance Predictive Capability of AI-Driven Mineral Prospectivity Mapping
Source: MDPI journal article supplement (doi:10.3390/fractalfract8040224), 2024-04-12
Supplement: s1 [file s1]

Table S1. Parameters used for training machine learning models.

| Model | Parameter         | Description                                                 | Range     |
|-------|-------------------|-------------------------------------------------------------|-----------|
| ANN   | hidden_size       | Number of neurons in the hidden layer                       | 2~100     |
|       | learning_rate     | Change rate of weight in the training process               | 0.0001~1  |
|       | n_estimators      | Number of trees in the random forest                        | 5~200     |
| RF    | max_depth         | Maximum number of splitting iterations                      | 2~20      |
|       | min_samples_leaf  | Minimum number of samples for end nodes                     | 2~10      |
|       | min_samples_split | The minimum number of samples in every leaf node            | 2~20      |
| DT    | max_depth         | Maximum number of splitting iterations in a single tree     | 2~20      |
|       | C_value           | Normalized parameters used for controlling model complexity | 0.001~200 |
| LR    | max_iter          | Maximum number of iterations at run time                    | 100~1000  |

Table S2. Optimal parameters of ANN models derived from grid-search training process.

| Training dataset | hidden_size | learning_rate | Accuracy of 10-fold validation |
|------------------|-------------|---------------|--------------------------------|
| Fra_Lab1         | 60          | 0.3501        | 0.8471                         |
| Fra_Lab2         | 40          | 0.0501        | 0.8726                         |
| Fra_Lab3         | 40          | 0.0501        | 0.8558                         |
| Fra_Lab4         | 60          | 0.5501        | 0.8511                         |
| Fra_Lab5         | 60          | 0.2501        | 0.8638                         |
| Fra_Lab6         | 20          | 0.8501        | 0.8475                         |
| Fra_Lab7         | 100         | 0.1501        | 0.8888                         |
| Fra_Lab8         | 40          | 0.1501        | 0.8475                         |
| Fra_Lab9         | 80          | 0.8001        | 0.8813                         |
| Fra_Lab10        | 20          | 0.3501        | 0.8679                         |
| NoFra_Lab1       | 60          | 0.0501        | 0.8382                         |
| NoFra_Lab2       | 100         | 0.6501        | 0.8639                         |
| NoFra_Lab3       | 40          | 0.1001        | 0.8558                         |
| NoFra_Lab4       | 20          | 0.2001        | 0.8509                         |
| NoFra_Lab5       | 80          | 0.0501        | 0.8426                         |
| NoFra_Lab6       | 60          | 0.3001        | 0.8676                         |
| NoFra_Lab7       | 20          | 0.0501        | 0.8806                         |
| NoFra_Lab8       | 20          | 0.1501        | 0.8601                         |
| NoFra_Lab9       | 80          | 0.1001        | 0.8678                         |
| NoFra_Lab10      | 20          | 0.1001        | 0.8685                         |

Training datasets listed in the first column correspond to the data files in the following path:  
 \Supplementary Materials\Code\6\_Machine-Learning\ANN\_Fra\TrainDataset and \Supplementary  
 Materials\Code\6\_Machine-Learning\ANN\_NoFra\TrainDataset.

Table S3. Optimal parameters of RF models derived from grid-search training process.

| Training dataset | n_estimators | max_depth | min_samples_leaf | Accuracy of 10-fold validation |
|------------------|--------------|-----------|------------------|--------------------------------|
| Fra_Lab1         | 5            | 10        | 6                | 0.8683                         |
| Fra_Lab2         | 150          | 10        | 10               | 0.8725                         |
| Fra_Lab3         | 5            | 5         | 4                | 0.8764                         |
| Fra_Lab4         | 5            | 10        | 8                | 0.8891                         |
| Fra_Lab5         | 100          | 10        | 4                | 0.8594                         |
| Fra_Lab6         | 5            | 2         | 4                | 0.8721                         |
| Fra_Lab7         | 150          | 5         | 8                | 0.8645                         |
| Fra_Lab8         | 150          | 10        | 2                | 0.8766                         |
| Fra_Lab9         | 100          | 2         | 2                | 0.873                          |
| Fra_Lab10        | 150          | 2         | 2                | 0.8723                         |
| NoFra_Lab1       | 50           | 5         | 8                | 0.8467                         |
| NoFra_Lab2       | 5            | 2         | 8                | 0.8728                         |
| NoFra_Lab3       | 50           | 10        | 2                | 0.8587                         |
| NoFra_Lab4       | 200          | 10        | 2                | 0.8935                         |
| NoFra_Lab5       | 100          | 2         | 2                | 0.8679                         |
| NoFra_Lab6       | 50           | 15        | 2                | 0.8719                         |
| NoFra_Lab7       | 150          | 5         | 2                | 0.8766                         |
| NoFra_Lab8       | 150          | 10        | 2                | 0.8551                         |
| NoFra_Lab9       | 5            | 2         | 4                | 0.8603                         |
| NoFra_Lab10      | 100          | 10        | 2                | 0.8803                         |

Training datasets listed in the first column correspond to the data files in the following path:  
 \Supplementary Materials\Code\6\_Machine-Learning\RF\_Fra\TrainDataset and \Supplementary  
 Materials\Code\6\_Machine-Learning\RF\_NoFra\TrainDataset.

Table S4. Optimal parameters of DT models derived from grid-search training process.

| Training dataset | min_samples_split | max_depth | Accuracy of 10-fold validation |
|------------------|-------------------|-----------|--------------------------------|
| Fra_Lab1         | 8                 | 5         | 0.8562                         |
| Fra_Lab2         | 17                | 8         | 0.8382                         |
| Fra_Lab3         | 2                 | 2         | 0.8643                         |
| Fra_Lab4         | 5                 | 11        | 0.817                          |
| Fra_Lab5         | 2                 | 8         | 0.8632                         |
| Fra_Lab6         | 14                | 8         | 0.8261                         |
| Fra_Lab7         | 2                 | 2         | 0.8511                         |
| Fra_Lab8         | 2                 | 2         | 0.8429                         |
| Fra_Lab9         | 11                | 5         | 0.8386                         |
| Fra_Lab10        | 17                | 5         | 0.8304                         |
| NoFra_Lab1       | 2                 | 2         | 0.8391                         |
| NoFra_Lab2       | 14                | 8         | 0.8263                         |
| NoFra_Lab3       | 2                 | 2         | 0.8643                         |
| NoFra_Lab4       | 17                | 8         | 0.8339                         |
| NoFra_Lab5       | 20                | 5         | 0.8422                         |
| NoFra_Lab6       | 2                 | 2         | 0.8216                         |
| NoFra_Lab7       | 2                 | 5         | 0.8551                         |
| NoFra_Lab8       | 2                 | 2         | 0.8429                         |
| NoFra_Lab9       | 11                | 8         | 0.8259                         |
| NoFra_Lab10      | 2                 | 2         | 0.8303                         |

Training datasets listed in the first column correspond to the data files in the following path:  
 \Supplementary Materials\Code\6\_Machine-Learning\DT\_Fra\TrainDataset and \Supplementary  
 Materials\Code\6\_Machine-Learning\DT\_NoFra\TrainDataset.

Table S5. Optimal parameters of LR models derived from grid-search training process.

| Training dataset | C_value | max_iter | Accuracy of 10-fold validation |
|------------------|---------|----------|--------------------------------|
| Fra_Lab1         | 20      | 100      | 0.8389                         |
| Fra_Lab2         | 10      | 100      | 0.8382                         |
| Fra_Lab3         | 10      | 100      | 0.8473                         |
| Fra_Lab4         | 30      | 100      | 0.8551                         |
| Fra_Lab5         | 10      | 100      | 0.8683                         |
| Fra_Lab6         | 10      | 100      | 0.8469                         |
| Fra_Lab7         | 20      | 100      | 0.8761                         |
| Fra_Lab8         | 20      | 100      | 0.8433                         |
| Fra_Lab9         | 10      | 100      | 0.8431                         |
| Fra_Lab10        | 10      | 100      | 0.8391                         |
| NoFra_Lab1       | 10      | 100      | 0.8375                         |
| NoFra_Lab2       | 20      | 100      | 0.8507                         |
| NoFra_Lab3       | 40      | 100      | 0.8428                         |
| NoFra_Lab4       | 10      | 100      | 0.8252                         |
| NoFra_Lab5       | 10      | 100      | 0.8683                         |
| NoFra_Lab6       | 10      | 100      | 0.8373                         |
| NoFra_Lab7       | 10      | 100      | 0.8803                         |
| NoFra_Lab8       | 10      | 100      | 0.8301                         |
| NoFra_Lab9       | 10      | 100      | 0.8594                         |
| NoFra_Lab10      | 70      | 100      | 0.8303                         |

Training datasets listed in the first column correspond to the data files in the following path:  
 \Supplementary Materials\Code\6\_Machine-Learning\LR\_Fra\TrainDataset and \Supplementary  
 Materials\Code\6\_Machine-Learning\LR\_NoFra\TrainDataset.
